# Supplementary material for: One-pot solvothermal synthesis of S doped BiOCl for solar water oxidation
Source: Royal Society of Chemistry journal article supplement (doi:10.1039/c5ra07776a), 2015-01-01
Supplement: c5ra07776a1.pdf [file c5ra07776a1.pdf]

## One-pot solvothermal synthesis of S doped BiOCl for solar water oxidation

Zaiyong Jiang,<sup>a</sup> Yuanyuan Liu,<sup>\*a</sup> Tao Jing,<sup>b</sup> Baibiao Huang,<sup>\*a</sup> Zeyan Wang,<sup>a</sup>

Xiaoyang Zhang,<sup>a</sup> Xiaoyan Qin<sup>a</sup> and Ying Dai<sup>b</sup>

<sup>a</sup> State Key Laboratory of Crystal Materials, Shandong University, Jinan 250100 (P. R. China)

E-mail: [yyliu@sdu.edu.cn](mailto:yyliu@sdu.edu.cn)(Yuanyuan Liu), [bbhuang@sdu.edu.cn](mailto:bbhuang@sdu.edu.cn)(Baibiao Huang).

<sup>b</sup> School of Physics, Shandong University, Jinan 250100 (P. R. China)

### Experimental Section

#### Materials

2-methoxyethanol, thiourea,  $\text{Bi}(\text{NO}_3)_3 \cdot 5\text{H}_2\text{O}$ ,  $\text{AgNO}_3$ , ethyl alcohol and 1-hexadecyl-3-methylimidazolium chloride ( $[\text{C}_{16}\text{Mim}]\text{Cl}$ ) were purchased from the Sinopharm Chemical Reagent Co., Ltd. (Shanghai, China). All chemicals were of analytical grade and were used without further purification. Deionized water (18 M $\Omega$ , Molecular) was used for all instrument and samples washes.

#### Preparation of S doped BiOCl

Firstly,  $\text{Bi}(\text{NO}_3)_3 \cdot 5\text{H}_2\text{O}$  (2-4mmol) was placed into 30-40 mL of 2-methoxyethanol solution with stirring. In addition, 1-hexadecyl-3-methylimidazolium chloride ( $[\text{C}_{16}\text{Mim}]\text{Cl}$ ) (3-6mmol) was also dissolved in 30-40 mL of 2-methoxyethanol. After 20 min, both solutions were mixed together. Afterwards, 0.078g thiourea was added into the mixed solution and steadily stirred 20min. The

mixture was transferred into a 100 mL autoclave, which was maintained at 160 °C for 1 h and cooled down to room temperature. Finally, the as-prepared S-BiOCl sample was washed 3 times with deionized water and 2 times with ethyl alcohol, then dried in oven at 60 °C for 6 h. The undoped BiOCl are fabricated with the same procedure described above without the use of thiourea.<sup>1</sup>

### **Characterization**

The morphologies of the as-prepared products were obtained via the Hitachi S-4800 microscope with an accelerating voltage of 7.0 kV. The chemical element mapping was characterized through an energy dispersive X-ray spectrometer equipped in the SEM machine. Powder X-ray diffraction (XRD) spectra measurements were carried out on a Bruker AXS D8 advance powder diffractometer with Cu K $\alpha$ X-ray radiation. Raman spectra were performed using Horiba LabRAM HR system, and laser radiation ( $\lambda$ = 1064 nm) served as excitation source. UV-Vis diffuse reflection spectra (DRS) were measured using a Shimadzu UV 2550 recording spectrophotometer equipped with an integrating sphere. The photoluminescence (PL) properties of the samples were characterized by Spectrofluorometer with an excitation wavelength at 310 nm.

### **Computational Method**

The first principles calculations were based on density functional theory within the Perdew–Burke–Emzerhof (PBE) exchange-correlation functional, the projector-augmented plane wave (PAW) approach were employed for the calculation of interactions between the valence electrons and the ionic cores. The structure of S

doped BiOCl with S at an O site or an Cl site was constructed on the basis of the 108-atom  $3 \times 3 \times 2$  supercell, which corresponding the 0.93% atomic concentration. The Brillouin zone was sampled with a  $2 \times 2 \times 2$  Monkhorst–Pack k-point grid. The convergence threshold for self-consistent iteration is set at  $10^{-6}$ eV, and the atomic coordinates and cell parameters are fully optimized until the values of all the residual force components are less than  $0.01 \text{ eV \AA}^{-1}$ . The density of states (DOS) for each optimized S doped BiOCl structure was calculated by using the tetrahedron method with Blöchl corrections. All the calculations were performed using the Vienna ab-initio simulation package (VASP). To determine the energy required for substituting S for either O or Cl in BiOCl, the defect formation energies have been calculated by

$$E^f(\text{defect}) = E(\text{defect}) - E(\text{total}) + \mu_R - \mu_S$$

Where  $E(\text{defect})$  is defined as the total energy of a supercell containing the defect,  $E(\text{total})$  is the total energy of a BiOCl perfect crystal in the same supercell,  $\mu_S$  is the chemical potential of S and  $\mu_R$  is the chemical potential of the atom replaced by S (i.e., O or Cl).

### **Photocatalytic water oxidation activity measurement**

The photocatalytic water oxidation activity of S doped BiOCl powder sample was performed in 100 mL of aqueous  $\text{AgNO}_3$  solution (0.015M) including 100 mg of the photocatalyst, which was kept at 20-25°C in a quartz reactor. The reactor was sealed and vacuumized for 30 min in order to drive away the residual oxygen and switched on the 300 W Xe lamp (PLS-SXE300, Beijing Trusttech Co., Ltd.). Finally, the gas chromatography with a thermal conductivity detector was applied to analysing the quantities of  $\text{O}_2$  production. For comparison, the photocatalytic activity of pure BiOCl

was also carried out under same conditions.

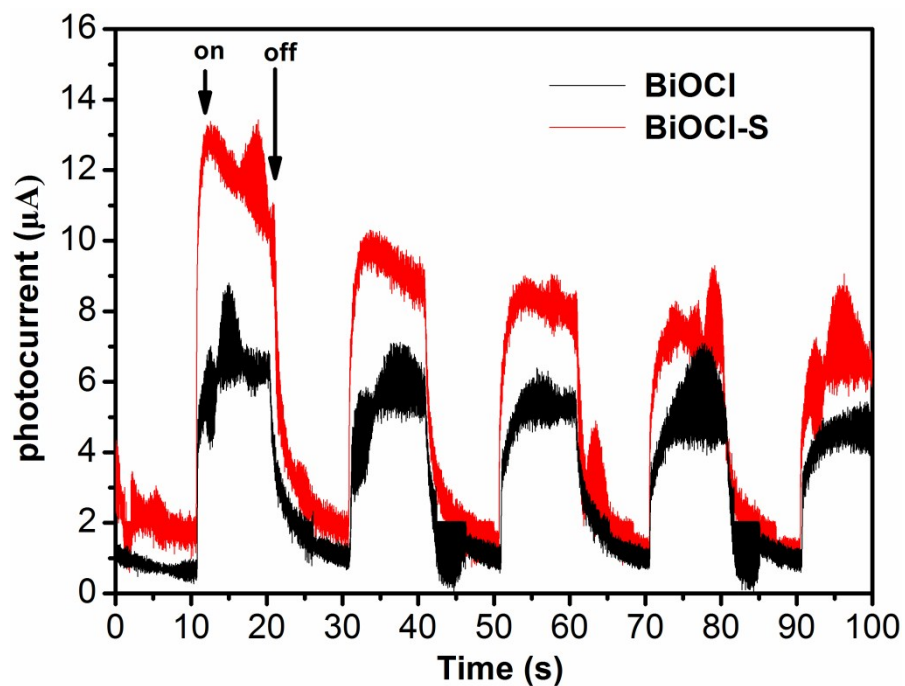

**Fig. S1.** Transient photocurrent responses of BiOCl and BiOCl-S under a bias of 0.4V.

The reference electrode was Ag/AgCl, and the electrolyte was 0.2 M Na<sub>2</sub>SO<sub>4</sub>

Transient photocurrent responses of the BiOCl and BiOCl-S were presented in Fig. S1. As can be seen, the photocurrent of BiOCl-S is higher than that of BiOCl, indicating more free electrons can be generated over BiOCl-S. Consequently, it can be concluded that the photogenerated electrons and holes in the BiOCl-S are separated more efficiently than those in the BiOCl.

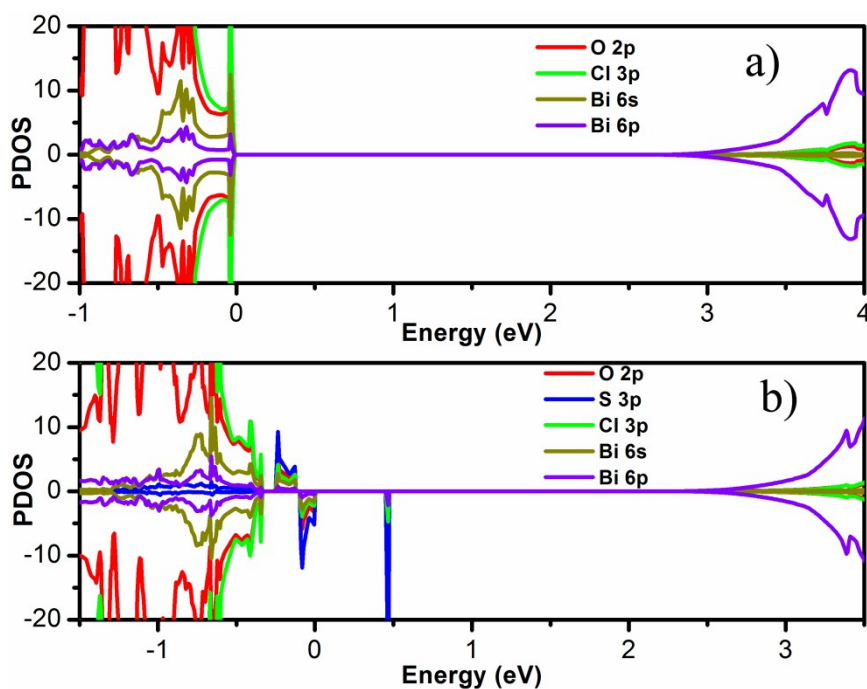

**Fig. S2.** Density of states (DOS) pattern of pure (a) and BiOCl-S (b)

We have calculated the density of states (DOS) of pure and S doped BiOCl. As shown in Fig S2, it is noted that the impurity states of BiOCl-S are mainly derived from the S 3p and O 2p orbitals, in addition, the Cl 3p and Bi 6s orbitals also make considerable contribution to these states. The strong hybrid between these orbitals is advantageous for the transfer of photo-generated carriers, which can further render the improvement of photocatalytic activity.

## REFERENCES

- 1 H. F. Cheng, B. B. Huang, Z. Y. Wang, X. Y. Qin, X. Y. Zhang, Y. Dai, *Chem. Eur. J.* 2011, **17**, 8039.
